# Supplementary material
Source: PubMed Central journal article supplement (PMC7739122)
Supplement: sj-pdf-2-pul-10.1177_2045894020943858.pdf [file sj-pdf-2-pul-10.1177_2045894020943858.pdf]

**Supplement Table 1.** The pre- and post-operative (during ICU stay) hemodynamic characteristics among 108 patients receiving mitral valve (MV) repair

| Variables                         | Pre-operation | Post-operation<br>(ICU stay) | P value |
|-----------------------------------|---------------|------------------------------|---------|
| <b>Hemodynamic data</b>           |               |                              |         |
| RA pressure (mmHg)                | 11.2±6.5      | 8.6±4                        | 0.28    |
| mRV pressure(mmHg)                | 25.4±8.3      | 16±5.3                       | 0.14    |
| mPA pressure (mmHg)               | 38.6±12.8     | 25.1±10.2                    | 0.06    |
| Wedge (mmHg)                      | 22.5±8.3      | 18.3±4.4                     | 0.34    |
| Cardiac index (l/m <sup>2</sup> ) | 2.8±1.1       | 3.4±0.6                      | 0.62    |
| PVR (woods)                       | 3.07±2.5      | 2.1±2.4                      | 0.1     |

Data are expressed as mean ± SD.

ICU= intensive care unit; RA= right atrial; mRV= mean right ventricular; mPA= mean pulmonary arterial; PVR= pulmonary vascular resistance

**Supplement Table 2.** The pre- and post-operative inotropic uses among 108 patients receiving mitral valve (MV) repair

| <b>Inotropic support</b> |           |
|--------------------------|-----------|
| Dobutamine, N (%)        | 78 (72.2) |
| Duration (day)           | 5.8±4.3   |
| Milrinone, N (%)         | 6 (5.5)   |
| Duration (day)           | 2.1±2.7   |

Data are expressed as mean ± SD.

**Supplement Table 3.** The baseline and follow-up clinical and echocardiographic characteristics of patients developing heart failure or not post mitral valve (MV) repair

| Variables                                       | Free from HF readmission (N=91) | HF readmission (N=17) | P value |
|-------------------------------------------------|---------------------------------|-----------------------|---------|
| <b>Clinical</b>                                 |                                 |                       |         |
| Age (y/o)                                       | 55.9 ± 25                       | 60.5 ± 18.3           | 3.28    |
| Male (%)                                        | 38 (41.7)                       | 9 (52.9)              | 2.82    |
| Body weight (kg)                                | 61.8 ± 11.3                     | 57.8 ± 19.2           | 1.53    |
| Body height (cm)                                | 161.5 ± 18.9                    | 160 ± 10.9            | 2.58    |
| NYF <sub>c</sub> , n(%)                         |                                 |                       |         |
| II                                              | 42 (46.2)                       | 6 (35.3)              | 0.68    |
| III                                             | 29 (31.8)                       | 7 (41.2)              | 0.47    |
| IV                                              | 20 (22)                         | 4 (23.5)              | 0.28    |
| Hypertension, n(%)                              | 45 (49.4)                       | 8 (47)                | 0.23    |
| Diabetes, n(%)                                  | 11 (12.1)                       | 2 (11.7)              | 0.26    |
| CAD, n(%)                                       | 10 (10.9)                       | 3 (17.6)              | 0.34    |
| Af (baseline)                                   | 42 (46.1)                       | 13 (76.4)             | 0.08    |
| Creatinine (mg/dl)                              | 1.2 ± 1.4                       | 0.9 ± 0.2             | 0.5     |
| NT-proBNP (pg/ml)                               | 4832.4 ± 1998.4                 | 4988.1 ± 3862.8       | 0.28    |
| <b>Surgeries</b>                                | 11(47.8)                        | 44 (51.7)             |         |
| MV annular ring                                 | 79 (86.8)                       | 14 (87.1)             | 0.21    |
| Repair leaflet                                  |                                 |                       |         |
| Anterior leaflet                                | 24 (26.4)                       | 4 (23.5)              | 0.63    |
| Posterior leaflet                               | 35 (38.4)                       | 8 (47)                | 0.73    |
| Both leaflets                                   | 17 (18.7)                       | 5 (29.4)              | 0.18    |
| Operation time (hr)                             | 5.8 ± 0.9                       | 5.8 ± 0.6             | 0.11    |
| Aortic clamping time (min)                      | 113.8 ± 33.9                    | 112 ± 42.3            | 0.28    |
| CPB time (min)                                  | 176.4 ± 49.3                    | 171 ± 39.5            | 2.16    |
| ICU stay (days)                                 | 2.8 ± 3.6                       | 3.4 ± 2.7             | 0.14    |
| <b>Echocardiography</b>                         |                                 |                       |         |
| LVEDV (baseline) (ml)                           | 67.2 ± 28.7                     | 73.2 ± 47.1           | 0.63    |
| LVESV (baseline) (ml)                           | 20.6 ± 10.9                     | 28.8 ± 21.8           | 0.11    |
| LVM <sub>I</sub> (baseline) (g/M <sup>2</sup> ) | 123.5 ± 39.9                    | 106.3 ± 40.2          | 0.32    |
| E/A (baseline)                                  | 2.9 ± 5.5                       | 1 ± 0.3               | 0.44    |
| E/e' (baseline)                                 | 11.2 ± 4.6                      | 15.7 ± 9.1            | 0.03    |
| LVEF (baseline) (%)                             | 65.5 ± 10.4                     | 62.5 ± 15.8           | 0.46    |

|                                    |                |              |      |
|------------------------------------|----------------|--------------|------|
| LVEF (post 1M) (%)                 | 68.1 ± 7.3     | 61.1 ± 12.7  | 0.08 |
| LVEF (post 6M) (%)                 | 64 ± 8.9       | 70.5 ± 11.4  | 0.18 |
| LVEF change (baseline to 1M) (%)   | 1.1±7.7        | -1.4±11.8    | 0.56 |
| LV GLS (baseline) (%)              | -20.1 ± 6.1    | -17.6 ± 6.7  | 0.32 |
| LV GLS (post 1M) (%)               | -16.6 ± 3.6    | -16.4 ± 4.3  | 0.88 |
| LV GLS (post 6M) (%)               | -15.3 ± 4.5    | -18.1 ± 3.37 | 0.34 |
| LV GLS change (baseline to 1M) (%) | 4.7±5.5        | 1.1±9.6      | 0.09 |
| <b>MV</b>                          | <b>3.1±4.4</b> |              |      |
| ERO (baseline) (%)                 | 2.7±0.7        | 0.4±0.07     | 0.3  |
| ERO (post 1M) (%)                  | 0.1±0.08       | 0.1±0.07     | 0.53 |
| ERO (post 6M) (%)                  | 0.07±0.05      | 0.1±0.1      | 0.35 |
| ERO change (baseline to 1M) (%)    | -0.3±0.2       | -0.2±0.1     | 0.47 |
| RVol (baseline) (ml)               | 73.9±29.8      | 61.9±11.9    | 0.26 |
| RVol (post 1M) (ml)                | 15.6±7.6       | 25.1±23.4    | 0.04 |
| RVol (post 6M) (ml)                | 11.4±10.7      | 4.4±0.9      | 0.42 |
| RVol change (baseline to 1M) (%)   | 22.6±12.5      | 35.2±13.4    | 0.3  |
| <b>RV</b>                          |                |              |      |
| TR VC (baseline) (cm)              | 0.4±0.2        | 0.3±0.1      | 0.45 |
| TR VC (post 1M) (cm)               | 0.3±0.2        | 0.6±0.3      | 0.08 |
| TR VC (post 6M) (cm)               | 0.5±0.5        | 0.2±0.1      | 0.43 |
| TR VC change (baseline to 1M) (%)  | -0.2±0.2       | 0.2±0.2      | 0.04 |
| RVSP (baseline) (mmHg)             | 34.3±21.1      | 25.4±10.4    | 0.22 |
| RVSP (post 1M) (mmHg)              | 22.7±8.4       | 22.2±12.3    | 0.9  |
| RVSP (post 6M) (mmHg)              | 22.3±9.6       | 21.5±5       | 0.86 |
| RVSP change (baseline to 1M) (%)   | 13.04±17.5     | -3.2±12      | 0.18 |
| PVR (baseline) (woods)             | 3.2±2.5        | 1.9±0.9      | 0.22 |
| PVR (post 1M) (woods)              | 2.8±1.4        | 1.8±1.2      | 0.87 |
| PVR (post 6M) (woods)              | 2±0.5          | 1.5±0.4      | 0.24 |
| PVR change (baseline to 1M) (%)    | -0.6±1.4       | 0.4±1.1      | 0.22 |
| FAC (baseline) (%)                 | 41.2±15.7      | 48.8±10.1    | 0.38 |

|                                       |           |           |       |
|---------------------------------------|-----------|-----------|-------|
| FAC (post 1M) (%)                     | 48.9±10.7 | 42.6±7.5  | 0.17  |
| FAC (post 6M) (%)                     | 44.6±15.1 | 47.8±1.9  | 0.77  |
| FAC change (baseline to 1M) (%)       |           |           | 0.61  |
| TAPSE (baseline) (cm)                 | 1.8±0.6   | 1.7±0.4   | 0.38  |
| TAPSE (post 1M) (cm)                  | 1.6±0.4   | 1.7±0.6   | 0.65  |
| TAPSE (post 6M) (cm)                  | 18.1±4.5  | 21.6±7.8  | 0.27  |
| TAPSE change (baseline to 1M) (%)     | -3.1±9.4  | -5.2±6.8  | 0.41  |
| S' (baseline) (cm/s)                  | 12.9±2.9  | 13.1±4.4  | 0.88  |
| S' (post 1M) (cm/s)                   | 11.1±2.2  | 9.9±2.1   | 0.26  |
| S' (post 6M) (cm/s)                   | 11.6±2.8  | 10.5±3.5  | 0.55  |
| S' change (baseline to 1M) (%)        | -2±2.7    | -3.1±3.9  |       |
| RV strain (baseline) (%)              | -13.1±8.4 | -16.3±2.7 | 0.32  |
| RV strain (post 1M) (%)               | -16.2±3.3 | -11.2±4.2 | 0.006 |
| RV strain (post 6M) (%)               | -17.8±3.3 | -15.2±4.4 | 0.26  |
| RV strain change (baseline to 1M) (%) | -3.5±7.5  | 5.1±5.7   | 0.001 |

Data are expressed as mean ± SD or number (%). P<0.05 as significance.

Abbreviations as Table 1, 2 and 3

**Supplement Table 4.** The regional differences of right ventricular (RV) strains in patients with non-reserved and reserved RV post mitral valve repair

| Variables                  | RV non-reserved (RV strain declined) N=23 | RV reserved (RV strain improved) N=85 | P value |
|----------------------------|-------------------------------------------|---------------------------------------|---------|
| RV strain (baseline)       |                                           |                                       | -       |
| Basal RV strain (%)        | -16.39±8.42                               | -12.41±7.2                            | 0.01    |
| Mid RV strain (%)          | -19.62±6.39                               | -14.34±9.23                           | 0.05    |
| Apical RV strain (%)       | -18.9±6.22                                | -17.44±5.52                           | 0.12    |
| RV strain (post 1M)        |                                           |                                       | -       |
| Basal RV strain (%)        | -13.49±6.52                               | -20.72±5.2                            | 0.01    |
| Mid RV strain (%)          | -15.37±8.89                               | -19.11±7.35                           | 0.32    |
| Apical RV strain (%)       | -17.23±7.05                               | -21.49±9.28                           | 0.81    |
| RV strain (baseline to 1M) |                                           |                                       | -       |
| Basal RV strain (%)        | 3.8±4.62                                  | -8.02±8.23                            | 0.001   |
| Mid RV strain (%)          | 4.17±5.84                                 | -5.1±1.5                              | 0.08    |
| Apical RV strain (%)       | 1.58±6.71                                 | -3.39±1.3                             | 0.45    |

Abbreviation as Table 2.
